# Supplementary material
Source: PubMed Central journal article supplement (PMC8677435)
Supplement: deab197_supplementary_figure_s1.pdf [file deab197_supplementary_figure_s1.pdf]

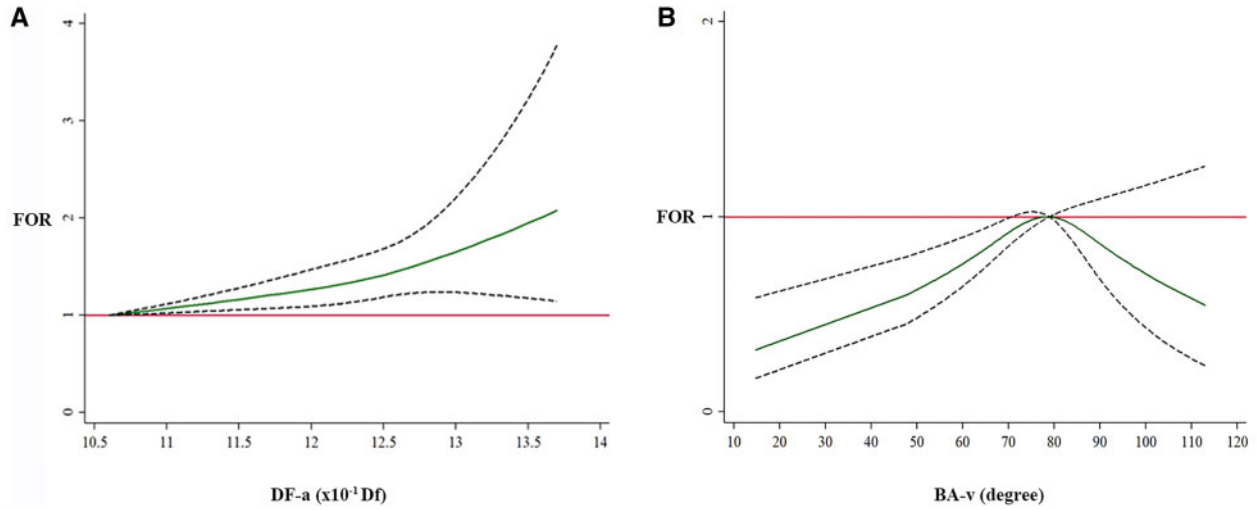

**Supplementary Figure S1. Association between retinal vascular features and fecundability odds ratio (FOR), fitted by restricted cubic spline.** (A) and (B) showed the crude association between FOR and DF-a or BA-v, fitted by restricted cubic spline respectively. The reference levels for FOR are respectively the lowest value in DF-a ( $10.5 \times 10^{-1}$  Df) and the median value in BA-v (79 degrees). Abbreviations: DF-a: fractal dimension-arteriole; BA-v: branching angle-venules; FOR: fecundability odds ratio.
