# Supplementary material
Source: PubMed Central journal article supplement (PMC8677435)
Supplement: deab197_supplementary_table_s1.pdf [file deab197_supplementary_table_s1.pdf]

**Supplementary Table S1. Comparison of maternal characteristics between participants excluded and included.**

| Characteristics                                             | Included (n = 652)<br>Mean (SD) or<br>Median* (IQR) or N (%) | Excluded (n = 380)<br>Mean (SD) or<br>Median* (IQR) or N (%) |
|-------------------------------------------------------------|--------------------------------------------------------------|--------------------------------------------------------------|
| Age, (years)                                                | 30.6 (3.7)                                                   | 31.1 (3.9)                                                   |
| Ethnicity                                                   |                                                              |                                                              |
| Chinese                                                     | 493 (75.6%)                                                  | 250 (65.8%)                                                  |
| Malay                                                       | 83 (12.7%)                                                   | 76 (20.0%)                                                   |
| Indian                                                      | 54 (8.3%)                                                    | 41 (10.8%)                                                   |
| Others                                                      | 22 (3.4%)                                                    | 13 (3.4%)                                                    |
| Maternal college, degree                                    |                                                              |                                                              |
| Yes                                                         | 433 (66.4%)                                                  | 202 (55.0%)                                                  |
| Nulliparity                                                 |                                                              |                                                              |
| Yes                                                         | 412 (63.2%)                                                  | 244 (64.2%)                                                  |
| Cycle length, days                                          |                                                              |                                                              |
| <28                                                         | 28 (4.3%)                                                    | 17 (4.5%)                                                    |
| 28–30                                                       | 302 (46.3%)                                                  | 163 (42.9%)                                                  |
| >30                                                         | 322 (49.4%)                                                  | 200 (52.6%)                                                  |
| Cycle regularity (variation of menstrual interval ≤ 5 days) |                                                              |                                                              |
| Yes                                                         | 432 (66.3%)                                                  | 223 (60.8%)                                                  |
| Age at menarche, years                                      | 12.4 (1.5)                                                   | 12.3 (1.3)                                                   |
| Age at menarche                                             |                                                              |                                                              |
| <12 years                                                   | 174 (27.0%)                                                  | 83 (22.7%)                                                   |
| 12–13 years                                                 | 336 (52.1%)                                                  | 218 (59.7%)                                                  |
| >13 years                                                   | 135 (20.9%)                                                  | 64 (17.5%)                                                   |
| BMI at study entry                                          |                                                              |                                                              |
| <18.5 kg/m <sup>2</sup>                                     | 321 (49.4%)                                                  | 141 (39.8%)                                                  |
| 18.5–22.9 kg/m <sup>2</sup>                                 | 64 (9.8%)                                                    | 20 (5.6%)                                                    |
| 23.0–27.4 kg/m <sup>2</sup>                                 | 162 (24.9%)                                                  | 105 (29.7%)                                                  |
| ≥27.5 kg/m <sup>2</sup>                                     | 103 (15.8%)                                                  | 88 (24.9%)                                                   |
| SBP, mmHg                                                   | 104.3 (9.2)                                                  | 106.6 (10.4)                                                 |
| DBP, mmHg                                                   | 68.0 (8.0)                                                   | 69.3 (9.0)                                                   |
| Fasting plasma glucose level ≥5.1 mmol/L at study entry     |                                                              |                                                              |
| Yes                                                         | 111 (17.1%)                                                  | 97 (27.5%)                                                   |
| Physical activity                                           |                                                              |                                                              |
| Inactive                                                    | 100 (15.4%)                                                  | 64 (17.9%)                                                   |
| Minimally active                                            | 328 (50.5%)                                                  | 177 (49.6%)                                                  |
| HEPA active                                                 | 221 (34.1%)                                                  | 116 (32.5%)                                                  |
| Micronutrient dietary supplements intake                    |                                                              |                                                              |
| Yes                                                         | 430 (66.0%)                                                  | 244 (64.2%)                                                  |
| Smoking exposure                                            |                                                              |                                                              |
| Past or current                                             | 54 (8.3%)                                                    | 53 (14.8%)                                                   |
| Alcohol intake                                              |                                                              |                                                              |
| Past or current                                             | 458 (70.2%)                                                  | 237 (62.4%)                                                  |
| Anxiety (STAI score ≥ 75th percentile)                      |                                                              |                                                              |
| Yes                                                         | 150 (25.2%)                                                  | 74 (28.5%)                                                   |

(continued)

Supplementary Table SI. Continued

| Characteristics                                    | Included (n = 652)<br>Mean (SD) or<br>Median* (IQR) or N (%) | Excluded (n = 380)<br>Mean (SD) or<br>Median* (IQR) or N (%) |
|----------------------------------------------------|--------------------------------------------------------------|--------------------------------------------------------------|
| Depression (EPDS score $\geq 14$ )                 |                                                              |                                                              |
| Yes                                                | 57 (9.5%)                                                    | 23 (8.7%)                                                    |
| Retinal microvascular features                     |                                                              |                                                              |
| CRAE*, $\mu\text{m}$                               | 119.0 (113.1, 125.0)                                         | 117.0 (111.3, 123.4)                                         |
| CRVE*, $\mu\text{m}$                               | 171.5 (163.2, 180.3)                                         | 170.2 (162.0, 179.7)                                         |
| DF-a*, $\times 10^{-1}$ Df                         | 12.5 (12.1, 12.8)                                            | 12.4 (12.1, 12.7)                                            |
| DF-v*, $\times 10^{-1}$ Df                         | 12.2 (11.9, 12.5)                                            | 12.2 (11.9, 12.6)                                            |
| BA-a*, degree                                      | 79.6 (73.0, 85.4)                                            | 79.8 (72.2, 84.6)                                            |
| BA-v*, degree                                      | 79.1 (73.0, 84.8)                                            | 78.7 (73.1, 84.1)                                            |
| Pregnancy within 1 year                            |                                                              |                                                              |
| Yes                                                | 276 (42.3%)                                                  | 180 (47.4%)                                                  |
| Attempting to conceive before study entry*, months | 3.1 (4.0)                                                    | 16.5 (22.6)                                                  |

SBP, systolic blood pressure; DBP, diastolic blood pressure; HEPA, health enhancing physical activity; STAI, state trait anxiety inventory; EPDS, Edinburgh postnatal depression scale; CRAE, central retinal arteriolar equivalent; CRVE, central retinal venular equivalent; DF-a, fractal dimension-arteriole; DF-v, fractal dimension-venule; BA-a, branching angle-arteriole; BA-v, branching angle-venule.

\*Median and interquartile range is applied in describing the retinal microvascular features and months attempting to conceive before study entry because these variables are not normally distributed.
