# Supplementary material
Source: PubMed Central journal article supplement (PMC8677435)
Supplement: deab197_supplementary_table_s2.pdf [file deab197_supplementary_table_s2.pdf]

**Supplementary Table SII. Comparison of maternal characteristics between eligible participants with complete and missing data of retinal indices.**

| Characteristics                                         | Eligible participants with complete data of retinal indices (N = 652)<br>Mean (SD) or N (%) | Eligible participants with missing data of retinal indices (N = 87)<br>Mean (SD) or N (%) | P <sup>†</sup> |
|---------------------------------------------------------|---------------------------------------------------------------------------------------------|-------------------------------------------------------------------------------------------|----------------|
| Age, (years)                                            | 30.6 (3.7)                                                                                  | 30.0 (3.3)                                                                                | 0.13           |
| Ethnicity                                               |                                                                                             |                                                                                           |                |
| Chinese                                                 | 493 (75.6)                                                                                  | 57 (65.6)                                                                                 | 0.05           |
| Malay                                                   | 83 (12.7)                                                                                   | 12 (13.8)                                                                                 |                |
| Indian                                                  | 54 (8.3)                                                                                    | 15 (17.2)                                                                                 |                |
| Others                                                  | 22 (3.4)                                                                                    | 3 (3.4)                                                                                   |                |
| Maternal college degree                                 |                                                                                             |                                                                                           |                |
| Yes                                                     | 433 (66.4)                                                                                  | 59 (67.8)                                                                                 | 0.89           |
| BMI at study entry,                                     |                                                                                             |                                                                                           |                |
| <18.5 kg/m <sup>2</sup>                                 | 319 (49.1)                                                                                  | 39 (49.4)                                                                                 | 0.37           |
| 18.5–22.9 kg/m <sup>2</sup>                             | 64 (9.9)                                                                                    | 4 (5.0)                                                                                   |                |
| 23.0–27.4 kg/m <sup>2</sup>                             | 163 (25.1)                                                                                  | 19 (24.1)                                                                                 |                |
| ≥27.5 kg/m <sup>2</sup>                                 | 103 (15.9)                                                                                  | 17 (21.5)                                                                                 |                |
| SBP, mmHg                                               | 104.27 (9.2)                                                                                | 104.29 (10.1)                                                                             | 0.99           |
| DBP, mmHg                                               | 66.8 (9.3)                                                                                  | 68.0 (8.0)                                                                                | 0.23           |
| Fasting plasma glucose level at study entry ≥5.1 mmol/L |                                                                                             |                                                                                           |                |
| Yes                                                     | 3.08 (4.0)                                                                                  | 2.59 (3.8)                                                                                | 0.46           |
| Physical activity                                       |                                                                                             |                                                                                           |                |
| Inactive                                                | 100 (15.4)                                                                                  | 3 (3.7)                                                                                   | 0.01           |
| Minimally active                                        | 328 (50.5)                                                                                  | 51 (62.2)                                                                                 |                |
| HEPA active                                             | 221 (34.1)                                                                                  | 28 (34.1)                                                                                 |                |
| Micronutrient dietary supplements intake                |                                                                                             |                                                                                           |                |
| Yes                                                     | 430 (66.0)                                                                                  | 48 (55.2)                                                                                 | <0.001         |
| Anxiety (STAI score ≥ 75th percentile)                  |                                                                                             |                                                                                           |                |
| Yes                                                     | 150 (25.2)                                                                                  | 16 (35.6)                                                                                 | 0.18           |
| Depression (EPDS score ≥ 14)                            |                                                                                             |                                                                                           |                |
| Yes                                                     | 57 (9.5)                                                                                    | 6 (13.3)                                                                                  | 0.56           |
| Pregnancy within 1 year                                 |                                                                                             |                                                                                           |                |
| Yes                                                     | 276 (42.3)                                                                                  | 42 (48.3)                                                                                 | 0.35           |
| Attempting to conceive before study entry, months       | 3.1 (4.0)                                                                                   | 2.6 (3.8)                                                                                 | 0.27           |

Abbreviations: SBP, systolic blood pressure; DBP, diastolic blood pressure; HEPA, health enhancing physical activity; STAI, state trait anxiety inventory; EPDS, Edinburgh postnatal depression scale.

†Student's *t*-test for parametric test while Wilcoxon rank-sum test for non-parametric.
