# Supplementary material
Source: PubMed Central journal article supplement (PMC8677435)
Supplement: deab197_supplementary_table_s3.pdf [file deab197_supplementary_table_s3.pdf]

**Supplementary Table III.** Cumulative pregnancy rate within 12 months among 270 couples with 0–1 month of pregnancy attempt time at study entry (n = 270).

| Number of months conceived after study entry (n) | Number of couples remained not pregnant (n) | Number of with-drawn (n) | Number of pregnancies (n) | Pregnancy rate at the specific window phase (%) | Cumulative pregnancy rate (%) |
|--------------------------------------------------|---------------------------------------------|--------------------------|---------------------------|-------------------------------------------------|-------------------------------|
| <b>0–1</b>                                       | 270                                         | 1                        | 6                         | 2.2                                             | 2.2                           |
| <b>1–2</b>                                       | 263                                         | 0                        | 14                        | 5.3                                             | 7.5                           |
| <b>2–3</b>                                       | 249                                         | 1                        | 15                        | 6.0                                             | 13.2                          |
| <b>3–4</b>                                       | 233                                         | 0                        | 8                         | 3.4                                             | 16.3                          |
| <b>4–5</b>                                       | 225                                         | 0                        | 10                        | 4.4                                             | 20.2                          |
| <b>5–6</b>                                       | 215                                         | 1                        | 20                        | 9.3                                             | 28.2                          |
| <b>6–7</b>                                       | 194                                         | 1                        | 5                         | 2.6                                             | 30.6                          |
| <b>7–8</b>                                       | 188                                         | 2                        | 11                        | 5.9                                             | 35.7                          |
| <b>8–9</b>                                       | 175                                         | 0                        | 8                         | 4.6                                             | 39.9                          |
| <b>9–10</b>                                      | 167                                         | 0                        | 8                         | 4.8                                             | 44.3                          |
| <b>10–11</b>                                     | 159                                         | 1                        | 10                        | 6.3                                             | 50.0                          |
| <b>11–12</b>                                     | 148                                         | 4                        | 8                         | 5.6                                             | 56.2                          |
