# Supplementary material
Source: PubMed Central journal article supplement (PMC8677435)
Supplement: deab197_supplementary_table_s4.pdf [file deab197_supplementary_table_s4.pdf]

**Supplementary Table SIV. Non-linear test of retinal vascular features and time to pregnancy.**

| Retinal parameters | Non-linear test |
|--------------------|-----------------|
| CRAE               | >0.05           |
| CRVE               | >0.05           |
| DF-a               | >0.05           |
| DF-v               | >0.05           |
| BA-a               | >0.05           |
| BA-v               | <0.05           |

Abbreviations: CRAE, central retinal arteriolar equivalent value; CRVE, central retinal venular equivalent value; DF-a, fractal dimension-arteriole; DF-v, fractal dimension-venule; BA-a, branching angle-arteriole; BA-v, branching angle-venule, value.
