# Supplementary material
Source: PubMed Central journal article supplement (PMC8677435)
Supplement: deab197_supplementary_table_s5.pdf [file deab197_supplementary_table_s5.pdf]

**Supplementary Table SV. Interaction test of retinal vascular features and other characteristics on time to pregnancy.**

| Retinal vascular features | Social and clinical characteristics   | Interaction |
|---------------------------|---------------------------------------|-------------|
| DF-a                      | Age                                   | >0.05       |
|                           | Ethnicity                             | >0.05       |
|                           | College education                     | >0.05       |
|                           | BMI at study entry                    | >0.05       |
|                           | Systolic blood pressure               | >0.05       |
|                           | STAI score                            | >0.05       |
|                           | EDPS score                            | >0.05       |
|                           | Physical activity                     | >0.05       |
|                           | Supplement intake                     | >0.05       |
|                           | Fasting plasma glucose at study entry | >0.05       |
| BA-v                      | Age                                   | >0.05       |
|                           | Ethnicity                             | >0.05       |
|                           | College education                     | >0.05       |
|                           | BMI at study entry                    | >0.05       |
|                           | Systolic blood pressure               | >0.05       |
|                           | STAI score                            | >0.05       |
|                           | EDPS score                            | >0.05       |
|                           | Physical activity                     | >0.05       |
|                           | Supplement intake                     | >0.05       |
|                           | Fasting plasma glucose at study entry | >0.05       |

Abbreviations: DF-a, fractal dimension-arteriole; BA-v, branching angle-venules.

Definition of covariates: maternal age, ethnicity (Chinese vs Malay vs Indian vs Others), college education (yes vs no) and EPDS score ( $\geq 14$  vs  $< 14$ ), maternal STAI score ( $\geq 75$ th vs  $< 75$ th percentile), physical activity (inactive vs minimally active vs HEPA active), supplement intake (yes vs no), maternal pre-pregnancy BMI (underweight vs normal weight vs overweight vs obese) and fasting plasma glucose ( $\geq 5.1$  vs  $< 5.1$  mmol/L) at study entry.
