# Supplementary material
Source: PubMed Central journal article supplement (PMC8677435)
Supplement: deab197_supplementary_table_s6.pdf [file deab197_supplementary_table_s6.pdf]

**Supplementary Table SVI. Association between retinal microvasculature (in tertiles) and time to pregnancy with complete dataset.**

| Retinal vascular features          | Time to pregnancy (n = 583) |                          |                          |
|------------------------------------|-----------------------------|--------------------------|--------------------------|
|                                    | Model 1<br>FOR (95% CI)     | Model 2<br>FOR (95% CI)  | Model 3<br>FOR (95% CI)  |
| <b>Retinal arteriolar features</b> |                             |                          |                          |
| CRAE                               |                             |                          |                          |
| T1                                 | 0.92 (0.68, 1.26)           | 0.91 (0.66, 1.25)        | 0.89 (0.64, 1.22)        |
| T2                                 | 0.96 (0.71, 1.31)           | 0.94 (0.69, 1.28)        | 0.93 (0.69, 1.27)        |
| T3                                 | Ref.                        | Ref.                     | Ref.                     |
| <i>P for trend</i>                 | 0.61                        | 0.55                     | 0.45                     |
| DF-a                               |                             |                          |                          |
| T1                                 | 0.78 (0.57, 1.06)           | 0.78 (0.57, 1.07)        | 0.74 (0.54, 1.01)        |
| T2                                 | <b>0.73 (0.54, 0.99)</b>    | <b>0.74 (0.54, 1.00)</b> | <b>0.71 (0.52, 0.97)</b> |
| T3                                 | Ref.                        | Ref.                     | Ref.                     |
| <i>P for trend</i>                 | 0.12                        | 0.13                     | 0.07                     |
| BA-a                               |                             |                          |                          |
| T1                                 | 0.80 (0.59, 1.08)           | 0.80 (0.59, 1.08)        | 0.75 (0.55, 1.01)        |
| T2                                 | 0.87 (0.64, 1.17)           | 0.86 (0.63, 1.17)        | 0.82 (0.61, 1.12)        |
| T3                                 | Ref.                        | Ref.                     | Ref.                     |
| <i>P for trend</i>                 | 0.14                        | 0.14                     | 0.06                     |
| <b>Retinal venular features</b>    |                             |                          |                          |
| CRVE                               |                             |                          |                          |
| T1                                 | Ref.                        | Ref.                     | Ref.                     |
| T2                                 | 0.99 (0.73, 1.35)           | 0.98 (0.71, 1.33)        | 0.96 (0.71, 1.32)        |
| T3                                 | 1.17 (0.86, 1.59)           | 1.18 (0.86, 1.61)        | 1.20 (0.88, 1.64)        |
| <i>P for trend</i>                 | 0.33                        | 0.30                     | 0.27                     |
| DF-v                               |                             |                          |                          |
| T1                                 | 0.95 (0.69, 1.30)           | 0.98 (0.71, 1.34)        | 0.94 (0.69, 1.30)        |
| T2                                 | 1.17 (0.86, 1.60)           | 1.18 (0.87, 1.61)        | 1.09 (0.80, 1.49)        |
| T3                                 | Ref.                        | Ref.                     | Ref.                     |
| <i>P for trend</i>                 | 0.71                        | 0.88                     | 0.71                     |
| BA-v                               |                             |                          |                          |
| T1                                 | 0.77 (0.57, 1.04)           | 0.77 (0.57, 1.04)        | 0.76 (0.54, 1.01)        |
| T2                                 | Ref.                        | Ref.                     | Ref.                     |
| T3                                 | <b>0.71 (0.52, 0.97)</b>    | <b>0.71 (0.52, 0.97)</b> | 0.74 (0.54, 1.01)        |

Abbreviations: FOR, fecundability odds ratio; T1, the lowest tertile; T2, the middle tertile; T3, the highest tertile; CRAE, central retinal arteriolar equivalent value; CRVE, central retinal venular equivalent value; DF-a, fractal dimension-arteriole; DF-v, fractal dimension-venule; BA-a, branching angle-arteriole; BA-v, branching angle-venule, value.

Model 1: Adjusted for maternal age, ethnicity (Chinese vs Malay vs Indian vs Others), college education (yes vs no), and EPDS score ( $\geq 14$  vs  $< 14$ ) collected at study entry. Model 2: Model 1 and maternal STAI score ( $\geq 75$ th vs  $< 75$ th percentile), systolic blood pressure, physical activity (inactive vs minimally active vs HEPA active), and micronutrient dietary supplements intake (yes vs no) at study entry. Model 3: Model 2 and additionally adjusted for BMI at study entry (underweight vs normal weight vs overweight vs obese) and fasting plasma glucose ( $\geq 5.1$  vs  $< 5.1$  mmol/L) at study entry.
